# Supplementary material for: Human Regulatory T Cell Suppressive Function Is Independent of Apoptosis Induction in Activated Effector T Cells
Source: PubMed Central journal article supplement (PMC2746309; doi:10.1371/journal.pone.0007183), 2009-09-25
Supplement: pone.0007183.s001.pdf [file pone.0007183.s001.pdf]

| IL-2                      | IL-7                           | IL-5               | IL-13                         | IL-10              | IFN $\gamma$               | TNF $\alpha$               | IL-17               |               |       |       |
|---------------------------|--------------------------------|--------------------|-------------------------------|--------------------|----------------------------|----------------------------|---------------------|---------------|-------|-------|
| 30.7<br>(45.1)            | 0.0<br>(0.0)                   | 14.6<br>(14.3)     | 112.3<br>(99.6)               | 141.4<br>(192.2)   | 367.8<br>(340.1)           | 461.2<br>(403.6)           | 773.3<br>(856.9)    | Teff          | -     |       |
| 78.3<br>(203.1)           | 0.0<br>(0.0)                   | 26.7<br>(26.8)     | 142.8<br>(133.4)              | 286.4<br>(363.8)   | 828.3<br>(745.2)           | 486.8<br>(548.0)           | 2273.6<br>(2859.2)  | Teff+<br>Teff |       |       |
| 7.4<br>(5.3)              | 0.0<br>(0.0)                   | 14.9<br>(12.3)     | 40.2<br>(35.8)                | 46.7<br>(44.8)     | 253.6<br>(324.4)           | 232.8<br>(319.6)           | 698.6<br>(847.7)    | 10-1          |       |       |
| 2.9<br>(2.5)              | 0.0<br>(0.0)                   | 14.4<br>(8.8)      | 27.2<br>(25.7)                | 59.3<br>(52.1)     | 131.2<br>(118.3)           | 202.6<br>(290.1)           | 721.4<br>(721.7)    | 5-1           |       |       |
| 2.1 <sup>#</sup><br>(1.7) | 0.0<br>(0.0)                   | 9.1<br>(8.8)       | 13.3 <sup>*</sup><br>(13.2)   | 59.8<br>(36.2)     | 17.9<br>(20.7)             | 110.5<br>(198.7)           | 393.5<br>(314.9)    | 2-1           |       |       |
| 3.5 <sup>#</sup><br>(6.7) | 0.0<br>(0.0)                   | 5.6<br>(4.0)       | 10.1<br>(7.7)                 | 61.3<br>(40.5)     | 10.9<br>(13.7)             | 32.1<br>(51.3)             | 844.2<br>(973.0)    | 1-1           |       |       |
| 0.6<br>(1.0)              | 0.0<br>(0.0)                   | 2.2<br>(0.3)       | 0.0<br>(0.0)                  | 12.3<br>(5.3)      | 0.0<br>(0.0)               | 2.7<br>(3.4)               | 44.4<br>(28.4)      | nTreg         |       |       |
| IL-2 <sup>#</sup>         | IL-7 <sup>ns</sup>             | IL-5 <sup>\$</sup> | IL-13 <sup>\$</sup>           | IL-10 <sup>#</sup> | IFN $\gamma$ <sup>ns</sup> | TNF $\alpha$ <sup>#</sup>  | IL-17 <sup>#</sup>  |               |       |       |
| 12878.2<br>(2170.6)       | 0.0<br>(0.0)                   | 360.3<br>(177.5)   | 4034.3<br>(1244.5)            | 2356.2<br>(2832.7) | 1036.7<br>(513.5)          | 1270.8<br>(560.8)          | 8328.4<br>(5514.3)  | Teff          |       | +IL-2 |
| 8756.7<br>(2776.0)        | 0.0<br>(0.0)                   | 267.6<br>(168.8)   | 2811.4<br>(1054.6)            | 1853.1<br>(594.7)  | 1478.4<br>(806.8)          | 1365.7<br>(985.3)          | 12036.4<br>(4362.6) | Teff+<br>Teff |       |       |
| 13720.8<br>(4420.5)       | 0.0<br>(0.0)                   | 298.7<br>(150.3)   | 4459.9<br>(262.8)             | 860.6<br>(822.5)   | 791.3<br>(122.1)           | 1022.6<br>(1262.0)         | 9417.6<br>(4929.7)  | 10-1          |       |       |
| 11399.4<br>(3157.0)       | 0.0<br>(0.0)                   | 455.1<br>(170.7)   | 3511.6<br>(1497.2)            | 885.9<br>(318.3)   | 893.5<br>(353.7)           | 697.4<br>(881.1)           | 6805.1<br>(5100.3)  | 5-1           |       |       |
| 11642.7<br>(6578.4)       | 0.0<br>(0.0)                   | 625.5<br>(364.7)   | 3082.3<br>(612.3)             | 1241.2<br>(973.0)  | 663.5<br>(223.4)           | 745.1<br>(419.3)           | 10086.6<br>(4898.7) | 2-1           |       |       |
| 6494.2<br>(7442.3)        | 0.0<br>(0.0)                   | 394.5<br>(412.2)   | 1927.7<br>(1478.0)            | 2005.5<br>(1467.8) | 513.6<br>(426.8)           | 509.0<br>(442.6)           | 9473.2<br>(6655.3)  | 1-1           |       |       |
| 13213.0<br>(2457.5)       | 0.0<br>(0.0)                   | 225.0<br>(184.6)   | 329.7 <sup>#</sup><br>(159.2) | 2214.1<br>(683.9)  | 26.0<br>(4.3)              | 49.6<br>(6.4)              | 5922.7<br>(1980.1)  | nTreg         |       |       |
| IL-2 <sup>ns</sup>        | IL-7 <sup>\$</sup>             | IL-5 <sup>ns</sup> | IL-13 <sup>ns</sup>           | IL-10 <sup>#</sup> | IFN $\gamma$ <sup>ns</sup> | TNF $\alpha$ <sup>ns</sup> | IL-17 <sup>ns</sup> |               |       |       |
| 52.0<br>(94.1)            | 2245.8<br>(417.7)              | 32.6<br>(11.0)     | 373.5<br>(103.5)              | 2114.2<br>(1872.5) | 1126.4<br>(1042.2)         | 778.4<br>(293.3)           | 4869.1<br>(3014.3)  | Teff          | +IL-7 |       |
| 2.5<br>(0.8)              | 983.3 <sup>#</sup><br>(127.1)  | 43.2<br>(14.4)     | 334.7<br>(176.4)              | 1854.1<br>(1233.8) | 1486.3<br>(887.6)          | 906.4<br>(345.3)           | 5021.8<br>(2421.1)  | Teff+<br>Teff |       |       |
| 2.2<br>(0.7)              | 2048.7<br>(557.2)              | 62.9<br>(36.9)     | 403.1<br>(100.4)              | 1708.6<br>(1795.6) | 1131.3<br>(827.4)          | 662.3<br>(391.0)           | 4210.7<br>(2207.8)  | 10-1          |       |       |
| 3.0<br>(0.2)              | 2103.1<br>(257.6)              | 45.5<br>(34.0)     | 331.2<br>(56.9)               | 2049.0<br>(1996.1) | 1205.4<br>(1213.2)         | 794.1<br>(286.4)           | 5026.6<br>(1879.6)  | 5-1           |       |       |
| 3.9<br>(5.3)              | 2479.4<br>(242.1)              | 62.8<br>(36.1)     | 282.7<br>(81.0)               | 861.4<br>(507.6)   | 570.7<br>(462.5)           | 621.3<br>(227.6)           | 3822.0<br>(867.8)   | 2-1           |       |       |
| 5.1<br>(5.4)              | 3427.8 <sup>#</sup><br>(655.3) | 86.5<br>(85.1)     | 354.1<br>(128.4)              | 719.3<br>(430.3)   | 342.9<br>(305.5)           | 375.0<br>(117.4)           | 4396.8<br>(2152.9)  | 1-1           |       |       |
| 1.2<br>(0.8)              | 4590.8 <sup>\$</sup><br>(77.1) | 13.8<br>(7.4)      | 38.4<br>(17.0)                | 203.3<br>(53.4)    | 2.6<br>(0.6)               | 20.5<br>(2.6)              | 399.5<br>(152.2)    | nTreg         |       |       |

**Supplementary Table 1. IL-2 and IL-7 inhibit nTreg mediated suppression of Teff cytokine production, but nTreg do not consume IL-2 or IL-7.** Cells were culture in 75  $\mu$ l medium for 5 days. Mean levels of cytokines, present in culture medium on day 5 of culture, in medium (-)(N=9), with addition of IL2 (IL-2)(N=5) or with addition of IL7 (IL-7)(N=5). All values (mean (SD)) are expressed in pg/ml.

When values were compared to Teff only: \*  $p < 0.05$ , #  $p < 0.01$ , \$  $p < 0.001$  (see table above per culture condition).

When cytokine values in cultures +IL-2 or +IL-7 were compared to medium: \*  $p < 0.05$ , #  $p < 0.01$ , \$  $p < 0.001$  ns=non-significant (see upper row of tables +IL-2 or +IL-7, significance is depicted per cytokine)
