# Supplementary material for: Human Regulatory T Cell Suppressive Function Is Independent of Apoptosis Induction in Activated Effector T Cells
Source: PubMed Central journal article supplement (PMC2746309; doi:10.1371/journal.pone.0007183), 2009-09-25
Supplement: pone.0007183.s002.pdf [file pone.0007183.s002.pdf]

| IL-2         | IL-7         | IL-5           | IL-13            | IL-10            | IFN $\gamma$      | TNF $\alpha$      | IL-17              |               |
|--------------|--------------|----------------|------------------|------------------|-------------------|-------------------|--------------------|---------------|
| 0.8<br>(0.9) | 0.0<br>(0.0) | 38.9<br>(38.1) | 153.9<br>(130.3) | 210.7<br>(168.3) | 1372.5<br>(952.8) | 380.7<br>(231.1)  | 2472.5<br>(1344.4) | Teff          |
| 0.6<br>(0.5) | 0.0<br>(0.0) | 91.5<br>(86.8) | 284.6<br>(227.2) | 357.9<br>(258.6) | 1777.5<br>(933.6) | 535.3<br>(166.50) | 3626.2<br>(1693.8) | Teff+<br>Teff |
| 0.1<br>(0.1) | 0.0<br>(0.0) | 22.0<br>(21.4) | 140.0<br>(189.4) | 134.1<br>(81.9)  | 818.1<br>(1006.0) | 244.5<br>(287.8)  | 1257.0<br>(877.1)  | 10-1          |
| 0.3<br>(0.6) | 0.0<br>(0.0) | 20.3<br>(17.7) | 102.1<br>(115.5) | 104.9<br>(58.8)  | 676.4<br>(1001.0) | 202.8<br>(292.7)  | 1573.5<br>(1152.0) | 5-1           |
| 0.1<br>(0.1) | 0.0<br>(0.0) | 4.8<br>(5.0)   | 22.8<br>(22.2)   | 83.9<br>(40.7)   | 383.7<br>(638.7)  | 123.5<br>(198.7)  | 940.6<br>(688.7)   | 2-1           |
| 0.0<br>(0.1) | 0.0<br>(0.0) | 1.3<br>(2.3)   | 7.3<br>(9.5)     | 70.0<br>(42.8)   | 105.8<br>(183.2)  | 35.0<br>(59.6)    | 487.4<br>(475.1)   | 1-1           |
| 0.0<br>(0.0) | 0.0<br>(0.0) | 1.5<br>(2.5)   | 3.0<br>(5.1)     | 32.0<br>(24.4)   | 3.4<br>(5.9)      | 2.4<br>(4.2)      | 96.3<br>(143.6)    | nTreg         |

**Supplementary Table 2. SF-Treg suppress Teff cytokine production.** Cells were cultured in 75  $\mu$ l medium for 5 days (N=3). Mean levels of cytokines, present in culture medium on day 5 of culture. All values (mean (SD)) are expressed in pg/ml.
