# Supplementary material for: Human Regulatory T Cell Suppressive Function Is Independent of Apoptosis Induction in Activated Effector T Cells
Source: PubMed Central journal article supplement (PMC2746309; doi:10.1371/journal.pone.0007183), 2009-09-25
Supplement: pone.0007183.s003.pdf [file pone.0007183.s003.pdf]

nTreg level of suppression

| IL-5                | IL-13  | IL-10     | IFNg    | TNFa       | IL-17      |           |
|---------------------|--------|-----------|---------|------------|------------|-----------|
| 0,0                 | 0,0    | 0,0       | 0,0     | 0,0        | 0,0        | Teff      |
| -158,6 <sup>#</sup> | -32,3  | -5940,3   | -275,1  | -132065,5  | -74842,6   | Teff+Teff |
| (209,8)             | (62,2) | (16939,9) | (416,4) | (396125,5) | (223559,2) |           |
| -209,8              | 57,1   | -5260,9   | 64,1    | -2939,6    | -64657,3*  | 10_1      |
| (346,7)             | (37,2) | (13951,6) | (36,1)  | (7919,8)   | (170978,5) |           |
| -221,8              | 73,2   | -1958,2   | 78,9    | 57,2       | -91260,8   | 5_1       |
| (258,1)             | (15,7) | (4821,8)  | (18,1)  | (34,4)     | (223069,9) |           |
| -95,6               | 78,4   | -14056,6  | 96,2    | -2043,2    | -57914,0   | 2_1       |
| (224,5)             | (29,5) | (39414,3) | (4,8)   | (6003,1)   | (163598,7) |           |
| 10,2                | 87,2   | -14488,1  | 96,3    | 83,0       | -80248,3*  | 1_1       |
| (94,4)              | (11,5) | (43205,0) | (6,2)   | (32,7)     | (240507,0) |           |

SF-Treg level of suppression

| IL-5                | IL-13  | IL-10  | IFNg   | TNFa   | IL-17  |           |
|---------------------|--------|--------|--------|--------|--------|-----------|
| 0,0                 | 0,0    | 0,0    | 0,0    | 0,0    | 0,0    | Teff      |
| -111,2 <sup>#</sup> | -124,5 | -111,2 | -44,8  | -73,4  | -59,0  | Teff+Teff |
| (98,6)              | (71,5) | (98,6) | (37,1) | (90,5) | (61,4) |           |
| 23,2                | 43,5   | 23,2   | 57,4   | 52,1   | 52,2*  | 10_1      |
| (26,8)              | (70,3) | (26,8) | (36,8) | (41,7) | (29,3) |           |
| 33,9                | 57,2   | 33,9   | 68,3   | 63,3   | 43,1   | 5_1       |
| (31,1)              | (43,2) | (31,1) | (39,1) | (45,5) | (32,5) |           |
| 38,5                | 90,1   | 38,5   | 83,5   | 78,4   | 65,4   | 2_1       |
| (46,3)              | (8,7)  | (46,3) | (26,3) | (31,7) | (22,7) |           |
| 50,2                | 97,0   | 50,2   | 95,6   | 94,0   | 81,0*  | 1_1       |
| (37,7)              | (3,5)  | (37,7) | (7,7)  | (9,7)  | (19,9) |           |

**Supplementary Table 3. The level of cytokine suppression for nTreg and SF-Treg.** In this table we show the averages (SD) level of suppression of cytokines in the cultures. We compared per cytokine, per co-culture condition whether there was a significant difference in cytokine suppression between nTreg and SF-Treg, by Mann Whitney U test, \* p< 0.05, # p<0.01.
